# Supplementary material
Source: Springer Nature journal article supplement (https://www.springermedizin.de/resource/supplementary/12911_2009_327_MOESM1_ESM.pdf/9525486)

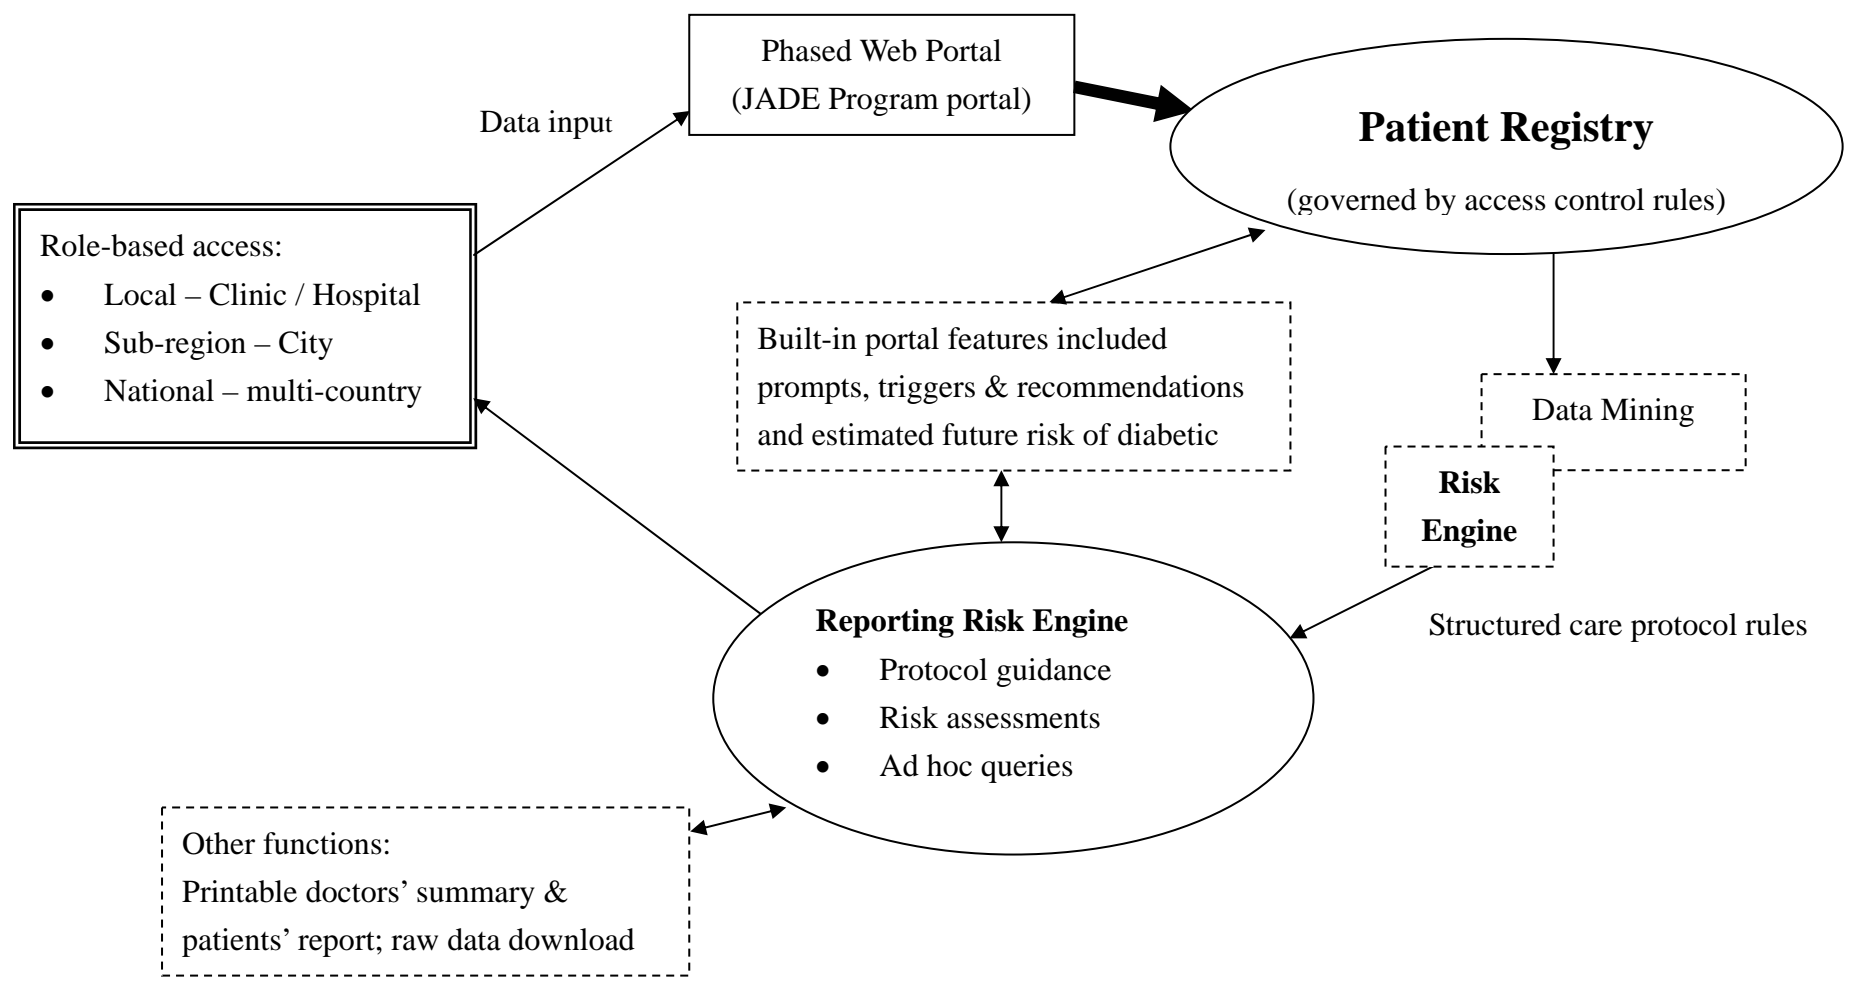

Supplement: MOESM1 [file 9525486]
